# Supplementary material
Source: PubMed Central journal article supplement (PMC395735)
Supplement: gb-2003-5-1-r3-s4.pdf [file gb-2003-5-1-r3-s4.pdf]

## Colour-coded list

The lists comprise factors of relative changes with respect to the control condition and the median value of normalised signal intensities. Significance levels were assessed by two reproducibility criteria as described by Fellenberg et al.<sup>1</sup>. The highly stringent 'min-max separation' is calculated by taking the minimum distance between all data points of one condition and all data points of the control condition. The less stringent criteria, called 'standard deviation separation', is defined as the difference of the means of the two data sets diminished by one standard deviation. In the tables, a colour-code indicates the two stringency measures. According to these criteria, data were classified as being of high or medium significance:

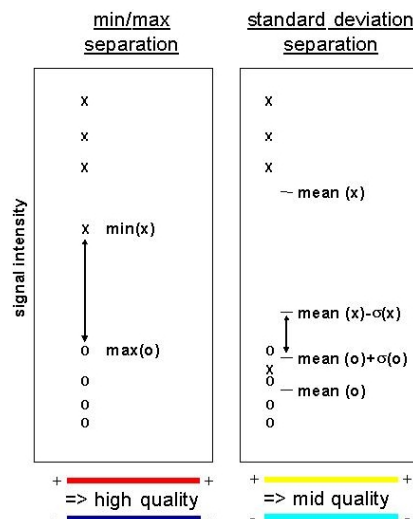

Upregulations are marked by warm (red and yellow), downregulations by cold colors (blue and light blue); high reproducibility is shown by dark (red and blue), medium reproducibility by light colors (yellow and light blue). If none of the two criteria is fulfilled the signal should be regarded as not reliable - even if a high ratio is displayed - and is tagged white in the colour coded list.

## References

1. Fellenberg, K., Hauser, N.C., Brors, B., Hoheisel, J.D. & Vingron, M. Microarray data warehouse allowing for inclusion of experiment annotations in statistical analysis. *Bioinformatics*. **18**, 423-433 (2002).























| Medication Analogue | Factor condition 1 g 1.01 | Factor condition 2 g 1.02 | Factor condition 3 g 1.03 | Factor condition 4 g 1.04 | Factor condition 5 g 1.05 | Factor condition 6 g 1.06 | Factor condition 7 g 1.07 | Factor condition 8 g 1.08 | Factor condition 9 g 1.09 | Factor condition 10 g 1.10 | Factor condition 11 g 1.11 | Factor condition 12 g 1.12 | Factor condition 13 g 1.13 | Factor condition 14 g 1.14 | Factor condition 15 g 1.15 | Factor condition 16 g 1.16 | Factor condition 17 g 1.17 | Factor condition 18 g 1.18 | Factor condition 19 g 1.19 | Factor condition 20 g 1.20 | Factor condition 21 g 1.21 | Factor condition 22 g 1.22 | Factor condition 23 g 1.23 | Factor condition 24 g 1.24 | Factor condition 25 g 1.25 | Factor condition 26 g 1.26 | Factor condition 27 g 1.27 | Factor condition 28 g 1.28 | Factor condition 29 g 1.29 | Factor condition 30 g 1.30 | Factor condition 31 g 1.31 | Factor condition 32 g 1.32 | Factor condition 33 g 1.33 | Factor condition 34 g 1.34 | Factor condition 35 g 1.35 | Factor condition 36 g 1.36 | Factor condition 37 g 1.37 | Factor condition 38 g 1.38 | Factor condition 39 g 1.39 | Factor condition 40 g 1.40 | Factor condition 41 g 1.41 | Factor condition 42 g 1.42 | Factor condition 43 g 1.43 | Factor condition 44 g 1.44 | Factor condition 45 g 1.45 | Factor condition 46 g 1.46 | Factor condition 47 g 1.47 | Factor condition 48 g 1.48 | Factor condition 49 g 1.49 | Factor condition 50 g 1.50 | Factor condition 51 g 1.51 | Factor condition 52 g 1.52 | Factor condition 53 g 1.53 | Factor condition 54 g 1.54 | Factor condition 55 g 1.55 | Factor condition 56 g 1.56 | Factor condition 57 g 1.57 | Factor condition 58 g 1.58 | Factor condition 59 g 1.59 | Factor condition 60 g 1.60 | Factor condition 61 g 1.61 | Factor condition 62 g 1.62 | Factor condition 63 g 1.63 | Factor condition 64 g 1.64 | Factor condition 65 g 1.65 | Factor condition 66 g 1.66 | Factor condition 67 g 1.67 | Factor condition 68 g 1.68 | Factor condition 69 g 1.69 | Factor condition 70 g 1.70 | Factor condition 71 g 1.71 | Factor condition 72 g 1.72 | Factor condition 73 g 1.73 | Factor condition 74 g 1.74 | Factor condition 75 g 1.75 | Factor condition 76 g 1.76 | Factor condition 77 g 1.77 | Factor condition 78 g 1.78 | Factor condition 79 g 1.79 | Factor condition 80 g 1.80 | Factor condition 81 g 1.81 | Factor condition 82 g 1.82 | Factor condition 83 g 1.83 | Factor condition 84 g 1.84 | Factor condition 85 g 1.85 | Factor condition 86 g 1.86 | Factor condition 87 g 1.87 | Factor condition 88 g 1.88 | Factor condition 89 g 1.89 | Factor condition 90 g 1.90 | Factor condition 91 g 1.91 | Factor condition 92 g 1.92 | Factor condition 93 g 1.93 | Factor condition 94 g 1.94 | Factor condition 95 g 1.95 | Factor condition 96 g 1.96 | Factor condition 97 g 1.97 | Factor condition 98 g 1.98 | Factor condition 99 g 1.99 | Factor condition 100 g 2.00 |
|---------------------|---------------------------|---------------------------|---------------------------|---------------------------|---------------------------|---------------------------|---------------------------|---------------------------|---------------------------|----------------------------|----------------------------|----------------------------|----------------------------|----------------------------|----------------------------|----------------------------|----------------------------|----------------------------|----------------------------|----------------------------|----------------------------|----------------------------|----------------------------|----------------------------|----------------------------|----------------------------|----------------------------|----------------------------|----------------------------|----------------------------|----------------------------|----------------------------|----------------------------|----------------------------|----------------------------|----------------------------|----------------------------|----------------------------|----------------------------|----------------------------|----------------------------|----------------------------|----------------------------|----------------------------|----------------------------|----------------------------|----------------------------|----------------------------|----------------------------|----------------------------|----------------------------|----------------------------|----------------------------|----------------------------|----------------------------|----------------------------|----------------------------|----------------------------|----------------------------|----------------------------|----------------------------|----------------------------|----------------------------|----------------------------|----------------------------|----------------------------|----------------------------|----------------------------|----------------------------|----------------------------|----------------------------|----------------------------|----------------------------|----------------------------|----------------------------|----------------------------|----------------------------|----------------------------|----------------------------|----------------------------|----------------------------|----------------------------|----------------------------|----------------------------|----------------------------|----------------------------|----------------------------|----------------------------|----------------------------|----------------------------|----------------------------|----------------------------|----------------------------|----------------------------|----------------------------|----------------------------|----------------------------|----------------------------|----------------------------|-----------------------------|
| Medication Analogue | 1.01                      | 1.02                      | 1.03                      | 1.04                      | 1.05                      | 1.06                      | 1.07                      | 1.08                      | 1.09                      | 1.10                       | 1.11                       | 1.12                       | 1.13                       | 1.14                       | 1.15                       | 1.16                       | 1.17                       | 1.18                       | 1.19                       | 1.20                       | 1.21                       | 1.22                       | 1.23                       | 1.24                       | 1.25                       | 1.26                       | 1.27                       | 1.28                       | 1.29                       | 1.30                       | 1.31                       | 1.32                       | 1.33                       | 1.34                       | 1.35                       | 1.36                       | 1.37                       | 1.38                       | 1.39                       | 1.40                       | 1.41                       | 1.42                       | 1.43                       | 1.44                       | 1.45                       | 1.46                       | 1.47                       | 1.48                       | 1.49                       | 1.50                       | 1.51                       | 1.52                       | 1.53                       | 1.54                       | 1.55                       | 1.56                       | 1.57                       | 1.58                       | 1.59                       | 1.60                       | 1.61                       | 1.62                       | 1.63                       | 1.64                       | 1.65                       | 1.66                       | 1.67                       | 1.68                       | 1.69                       | 1.70                       | 1.71                       | 1.72                       | 1.73                       | 1.74                       | 1.75                       | 1.76                       | 1.77                       | 1.78                       | 1.79                       | 1.80                       | 1.81                       | 1.82                       | 1.83                       | 1.84                       | 1.85                       | 1.86                       | 1.87                       | 1.88                       | 1.89                       | 1.90                       | 1.91                       | 1.92                       | 1.93                       | 1.94                       | 1.95                       | 1.96                       | 1.97                       | 1.98                       | 1.99                       | 2.00                        |

















| Healthcare Analytics | Factor condition 1 | Factor condition 2 | Factor condition 3 | Factor condition 4 | Factor condition 5 | Factor condition 6 | Factor condition 7 | Factor condition 8 | Factor condition 9 | Factor condition 10 | Factor condition 11 | Factor condition 12 | Factor condition 13 | Factor condition 14 | Factor condition 15 | Factor condition 16 | Factor condition 17 | Factor condition 18 | Factor condition 19 | Factor condition 20 | Factor condition 21 | Factor condition 22 | Factor condition 23 | Factor condition 24 | Factor condition 25 | Factor condition 26 | Factor condition 27 | Factor condition 28 | Factor condition 29 | Factor condition 30 | Factor condition 31 | Factor condition 32 | Factor condition 33 | Factor condition 34 | Factor condition 35 | Factor condition 36 | Factor condition 37 | Factor condition 38 | Factor condition 39 | Factor condition 40 | Factor condition 41 | Factor condition 42 | Factor condition 43 | Factor condition 44 | Factor condition 45 | Factor condition 46 | Factor condition 47 | Factor condition 48 | Factor condition 49 | Factor condition 50 | Factor condition 51 | Factor condition 52 | Factor condition 53 | Factor condition 54 | Factor condition 55 | Factor condition 56 | Factor condition 57 | Factor condition 58 | Factor condition 59 | Factor condition 60 | Factor condition 61 | Factor condition 62 | Factor condition 63 | Factor condition 64 | Factor condition 65 | Factor condition 66 | Factor condition 67 | Factor condition 68 | Factor condition 69 | Factor condition 70 | Factor condition 71 | Factor condition 72 | Factor condition 73 | Factor condition 74 | Factor condition 75 | Factor condition 76 | Factor condition 77 | Factor condition 78 | Factor condition 79 | Factor condition 80 | Factor condition 81 | Factor condition 82 | Factor condition 83 | Factor condition 84 | Factor condition 85 | Factor condition 86 | Factor condition 87 | Factor condition 88 | Factor condition 89 | Factor condition 90 | Factor condition 91 | Factor condition 92 | Factor condition 93 | Factor condition 94 | Factor condition 95 | Factor condition 96 | Factor condition 97 | Factor condition 98 | Factor condition 99 | Factor condition 100 |
|----------------------|--------------------|--------------------|--------------------|--------------------|--------------------|--------------------|--------------------|--------------------|--------------------|---------------------|---------------------|---------------------|---------------------|---------------------|---------------------|---------------------|---------------------|---------------------|---------------------|---------------------|---------------------|---------------------|---------------------|---------------------|---------------------|---------------------|---------------------|---------------------|---------------------|---------------------|---------------------|---------------------|---------------------|---------------------|---------------------|---------------------|---------------------|---------------------|---------------------|---------------------|---------------------|---------------------|---------------------|---------------------|---------------------|---------------------|---------------------|---------------------|---------------------|---------------------|---------------------|---------------------|---------------------|---------------------|---------------------|---------------------|---------------------|---------------------|---------------------|---------------------|---------------------|---------------------|---------------------|---------------------|---------------------|---------------------|---------------------|---------------------|---------------------|---------------------|---------------------|---------------------|---------------------|---------------------|---------------------|---------------------|---------------------|---------------------|---------------------|---------------------|---------------------|---------------------|---------------------|---------------------|---------------------|---------------------|---------------------|---------------------|---------------------|---------------------|---------------------|---------------------|---------------------|---------------------|---------------------|---------------------|---------------------|---------------------|---------------------|----------------------|
| HEALTHCARE ANALYTICS | 1.20               | 1.10               | 1.30               | 1.40               | 1.50               | 1.60               | 1.70               | 1.80               | 1.90               | 2.00                | 2.10                | 2.20                | 2.30                | 2.40                | 2.50                | 2.60                | 2.70                | 2.80                | 2.90                | 3.00                | 3.10                | 3.20                | 3.30                | 3.40                | 3.50                | 3.60                | 3.70                | 3.80                | 3.90                | 4.00                | 4.10                | 4.20                | 4.30                | 4.40                | 4.50                | 4.60                | 4.70                | 4.80                | 4.90                | 5.00                | 5.10                | 5.20                | 5.30                | 5.40                | 5.50                | 5.60                | 5.70                | 5.80                | 5.90                | 6.00                | 6.10                | 6.20                | 6.30                | 6.40                | 6.50                | 6.60                | 6.70                | 6.80                | 6.90                | 7.00                | 7.10                | 7.20                | 7.30                | 7.40                | 7.50                | 7.60                | 7.70                | 7.80                | 7.90                | 8.00                | 8.10                | 8.20                | 8.30                | 8.40                | 8.50                | 8.60                | 8.70                | 8.80                | 8.90                | 9.00                | 9.10                | 9.20                | 9.30                | 9.40                | 9.50                | 9.60                | 9.70                | 9.80                | 9.90                | 10.00               |                     |                     |                     |                     |                     |                     |                     |                     |                     |                      |
